# Supplementary material for: Anion-controlled formation of an aminal-(bis)imine Fe(ii)-complex
Source: Royal Society of Chemistry journal article supplement (doi:10.1039/c4dt02180k), 2014-01-01
Supplement: c4dt02180k1.pdf [file c4dt02180k1.pdf]

Supporting Information File

## Anion-controlled formation of an aminoral-(bis)imine Fe(II)-complex

Chandan Giri,<sup>a,b</sup> Filip Topić,<sup>a</sup> Prasenjit Mal\*<sup>b</sup> and Kari Rissanen\*<sup>a</sup>

<sup>a</sup>Department of Chemistry, Nanoscience Center, University of Jyväskylä, P.O. Box 35, FIN-40351 Finland; Tel: +358-50-5623721; email: [kari.t.rissanen@jyu.fi](mailto:kari.t.rissanen@jyu.fi)

<sup>b</sup>School of Chemical Sciences, NISER Bhubaneswar, PO Sainik School, IOP Campus, Bhubaneswar, Odisha, India 751005; Tel: +916742304073; email: [pmal@niser.ac.in](mailto:pmal@niser.ac.in)

### EXPERIMENTAL SECTION

<sup>1</sup>H NMR and <sup>13</sup>C NMR were measured on a Bruker AV 500 (500 MHz). All the <sup>1</sup>H NMR was carried at room temperature mainly in deuterated chloroform unless specified otherwise.

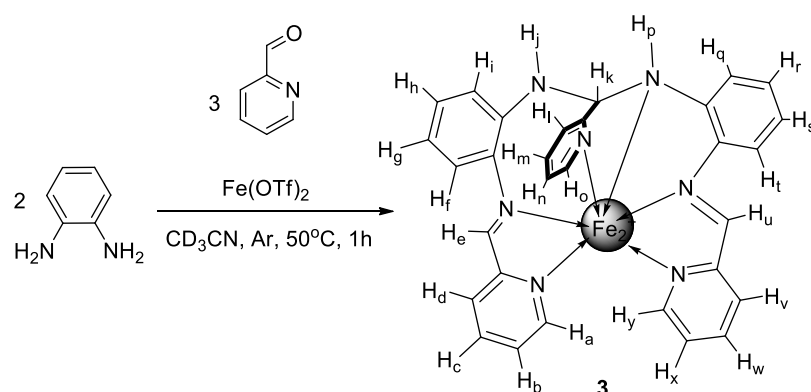

**Figure S1.** Synthesis of **3** in acetonitrile.

Synthesis of **3**: Into a j-young NMR tube were added 1,2-diaminobenzene (2.0 mg, 18.5  $\mu$ mol), pyridine-2-carboxaldehyde (2.64  $\mu$ l, 27.7  $\mu$ mol), iron(II) triflate (3.27 mg, 9.2  $\mu$ mol) and CD<sub>3</sub>CN (0.5 mL). The tube was sealed, and the solution purged off dioxygen by three vacuum/argon fill cycles. All starting materials dissolved in degassed CD<sub>3</sub>CN giving a dark purple solution. The tube was placed in an oil bath at 323 K for 1 h. <sup>1</sup>H NMR: ( 500 MHz, 303 K, in CD<sub>3</sub>CN);  $\delta$  = 10.22(s, 1H, H<sub>u</sub>), 9.70 (s, 1H, H<sub>e</sub>), 8.36 (m, 3H, H<sub>v</sub>, H<sub>r</sub>, H<sub>d</sub>), 8.12 (d,  $J$  = 5 Hz, H<sub>y</sub>), 8.07 (td,  $J_1$  = 8 Hz,  $J_2$  = 1.5 Hz H<sub>w</sub>), 7.95 (td,  $J_1$  = 8 Hz,  $J_2$  = 1.5 Hz H<sub>c</sub>), 7.75 (m, 1H, H<sub>q</sub>), 7.70 (d,  $J$  = 5.5 Hz, H<sub>a</sub>), 7.66 (m, 3H, H<sub>f</sub>, H<sub>s</sub>, H<sub>t</sub>), 7.56 (m, 2H, H<sub>m</sub>, H<sub>x</sub>), 7.37 (d,  $J$  = 8, H<sub>l</sub>), 7.27 (td,  $J_1$  = 6 Hz,  $J_2$  = 1.5 Hz, H<sub>b</sub>), 7.15 (m, 2H, H<sub>g</sub>, H<sub>h</sub>), 6.87 (m, 2H, H<sub>i</sub>, H<sub>n</sub>), 6.33 (dt,  $J_1$  = 6 Hz,  $J_2$  = 1 Hz, H<sub>o</sub>), 6.00 (d,  $J$  = 8.5, H<sub>k</sub>), 5.69

(d,  $J = 8.5$ ,  $H_j$ ), 5.37 (s,  $h_p$ ) ppm;  $^{13}\text{C}$  NMR( 125 MHz, 303K,  $\text{CD}_3\text{CN}$ ):  $\delta = 173.5, 163.5, 161.5, 161.4, 159.8, 155.5, 154.9, 152.9, 149.1, 144.0, 143.5, 139.7, 139.5, 138.8, 138.4, 134.1, 131.4, 131.0, 130.9, 130.2, 129.5, 128.8, 128.0, 128.0, 127.0, 126.2, 126.1, 124.2, 122.0, 84.1$  ppm; ESI-MS:  $m/z$ : 269.58  $[\text{FeL}]^{2+}$ , 688.14  $[(\text{FeL})(\text{OTf})]^+$ . Elemental analysis  $[\text{C}_{30}\text{H}_{25}\text{N}_7\text{Fe}]^{2+}(\text{CF}_3\text{SO}_3)^-_2$  Observed: C = 45.83, H = 3.31, N = 11.84, Calculated: C = 45.89, H = 3.01, N = 11.71.

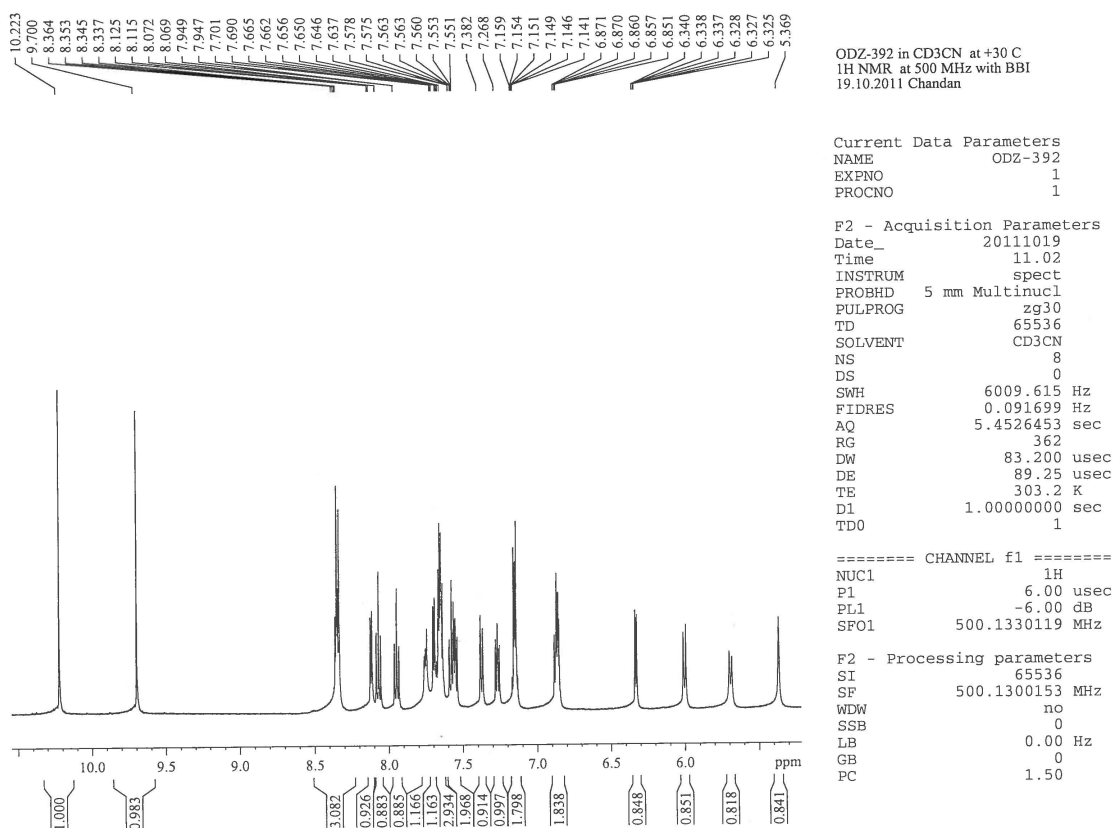

**Figure S2.**  $^1\text{H}$  NMR of complex **3** in  $\text{CD}_3\text{CN}$ .

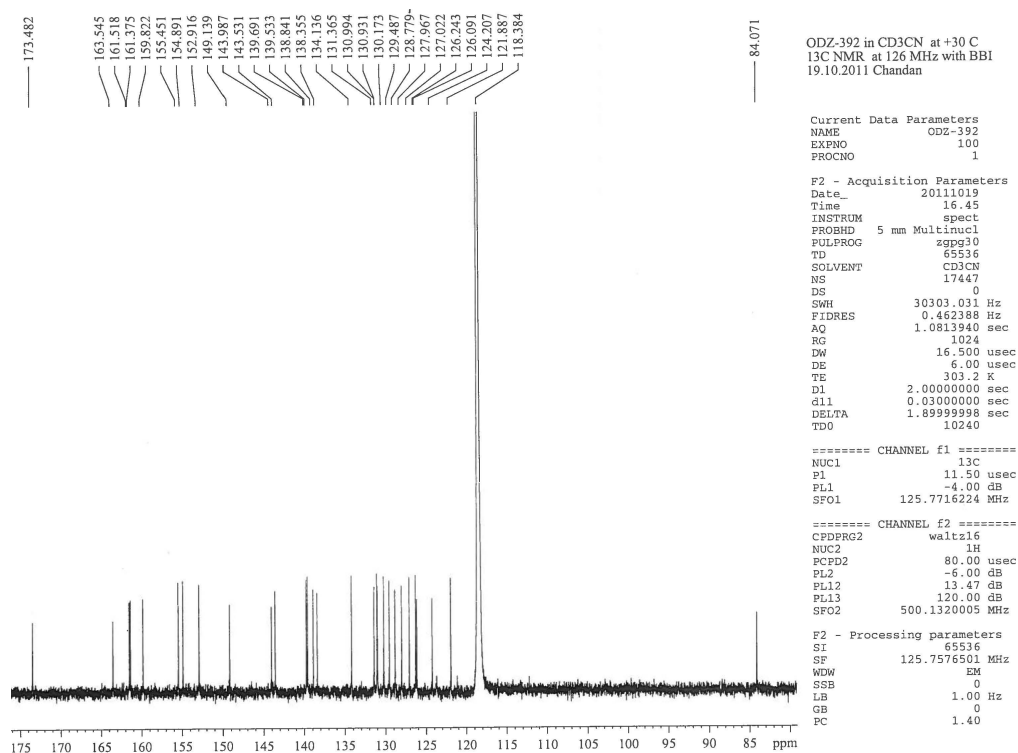

Figure S3. <sup>13</sup>C NMR of complex **3** in CD<sub>3</sub>CN.

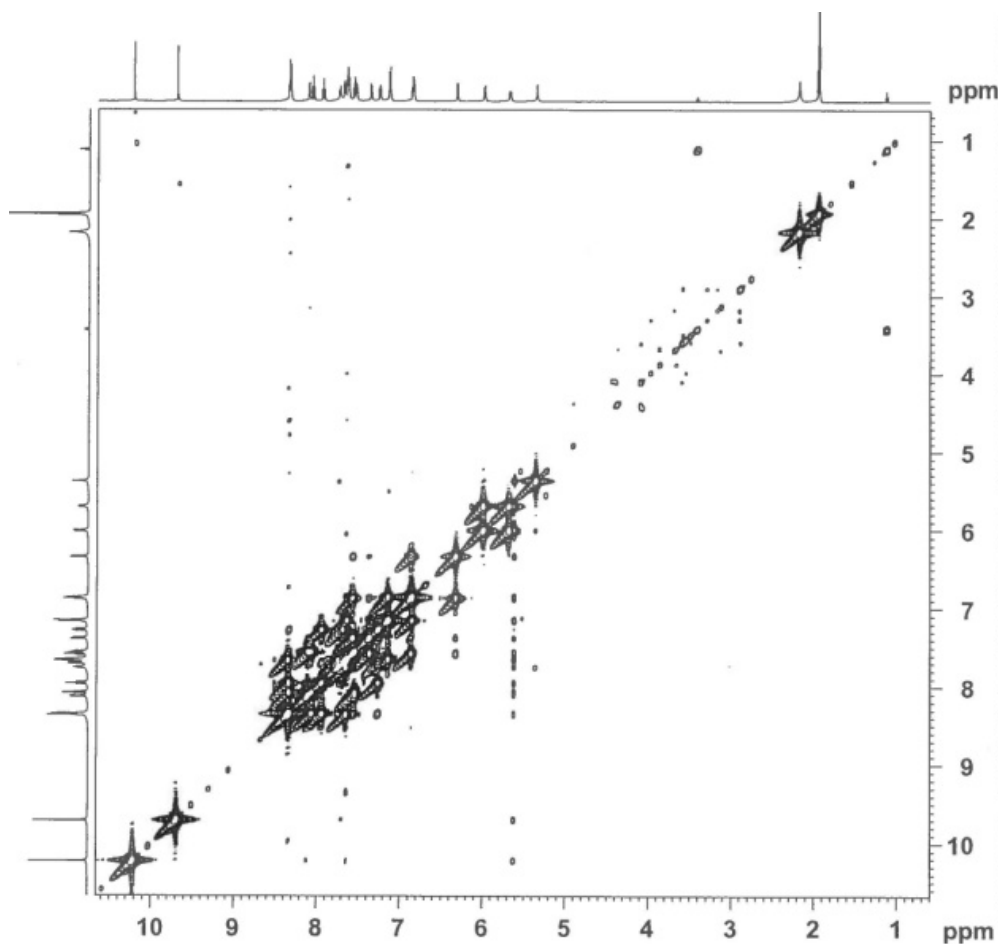

Figure S4. <sup>1</sup>H-<sup>1</sup>H COSY NMR of complex **3** in CD<sub>3</sub>CN.

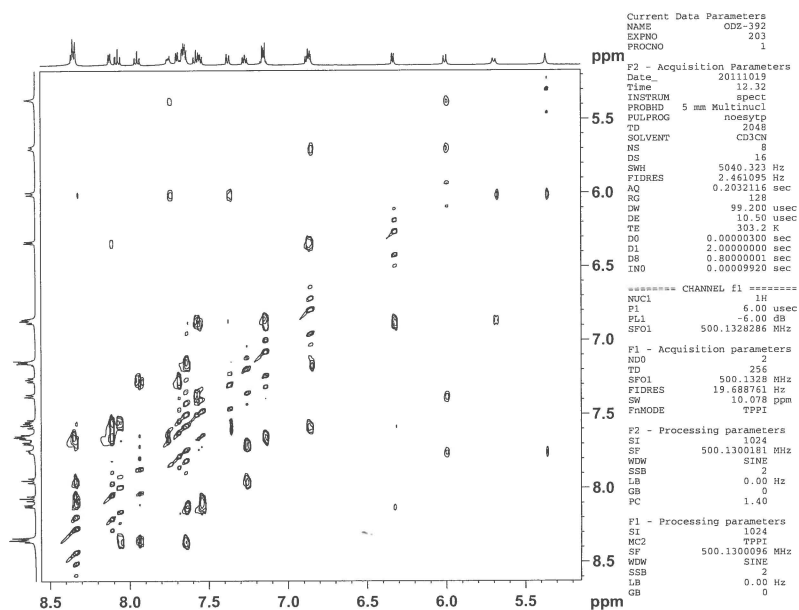

Figure S5.  $^1\text{H}$ - $^1\text{H}$  NOESY NMR of complex **3**.

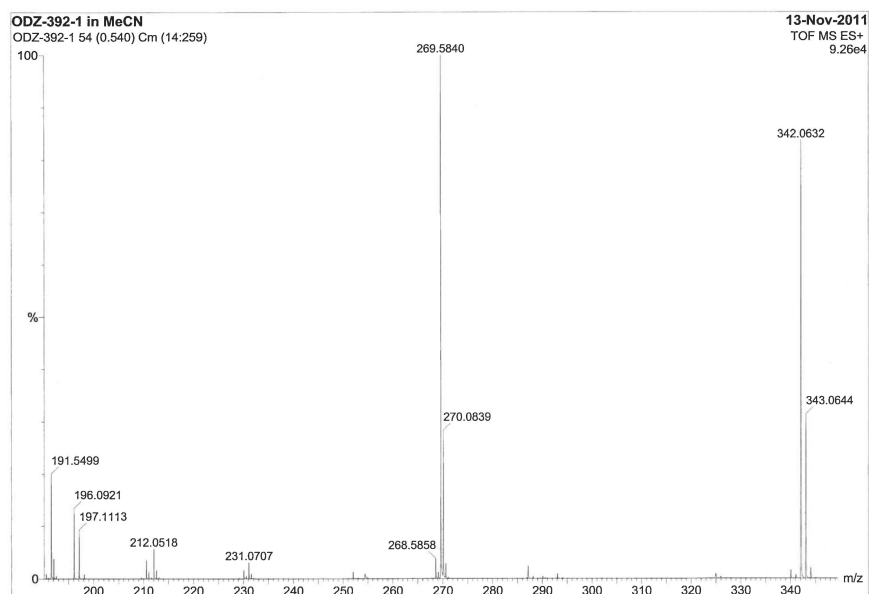

Figure S6. ESI-MS of complex **3**.

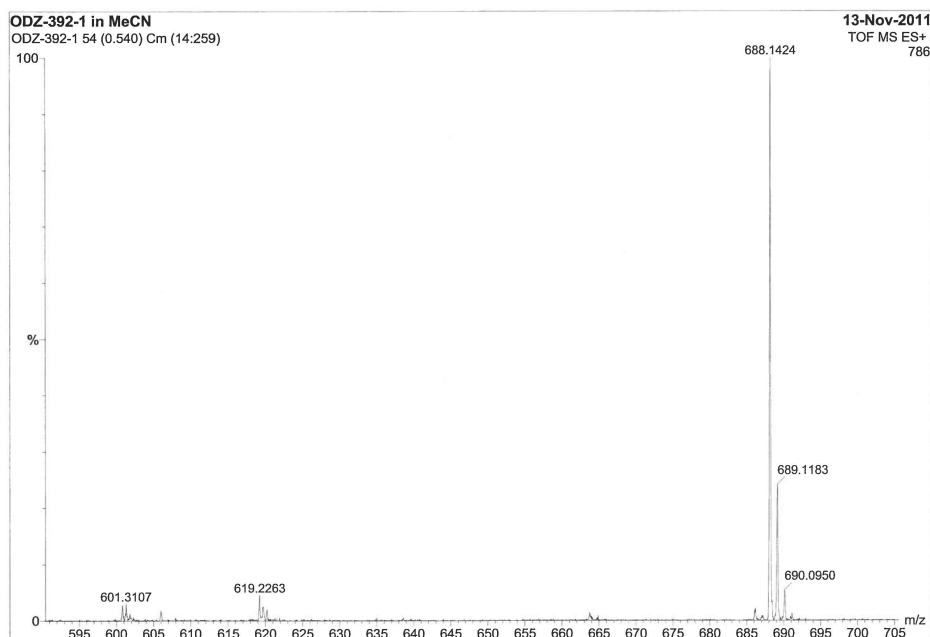

**Figure S7.** ESI-MS of complex **3**.

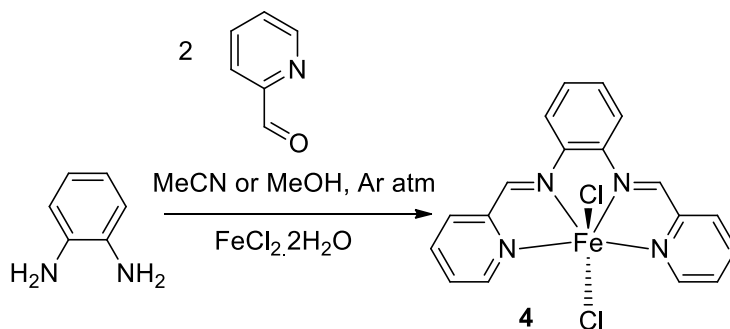

**Figure S8.** Synthesis of complex **4**.

**Synthesis of 4.** Into a j-young NMR tube were added 1,2-diaminobenzene (1.5 mg, 13.9  $\mu\text{mol}$ ), 2-formyl pyridine (2.64  $\mu\text{l}$ , 27.7  $\mu\text{mol}$ ) and iron(II) chloride dihydrate (2.24 mg, 13.9  $\mu\text{mol}$ ) and  $\text{CD}_3\text{OD}$  (0.5 mL). The tube was sealed, and the solution purged of dioxygen by three vacuum/argon fill cycles. All starting materials dissolved in degassed  $\text{CD}_3\text{OD}$  giving a dark green solution. The tube was placed in an oil bath at 323 K. After 2 h  $^1\text{H}$  NMR was checked and only a broad peak was observed. Diffusion of di ethyl-ether to the solution **4** isolated the single crystal.

## Molecular modeling

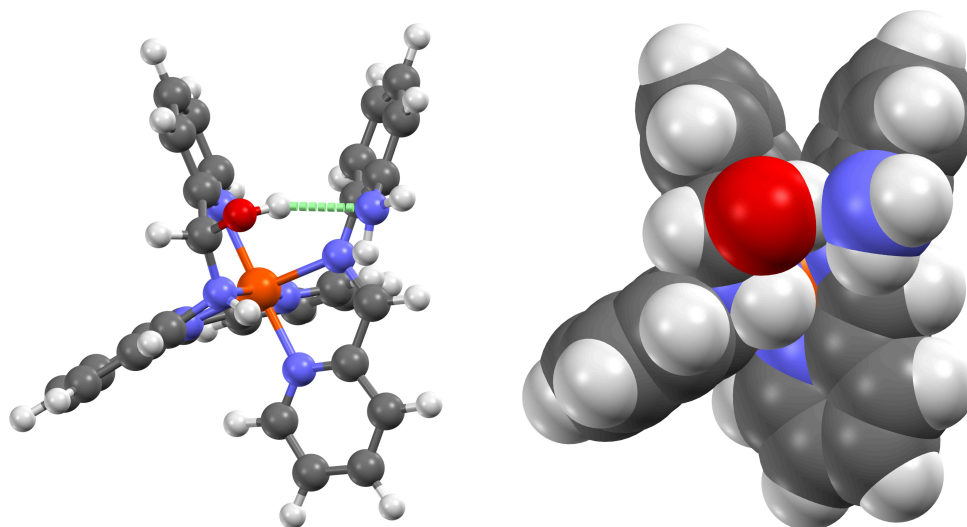

**Figure S8.** The calculated structure of the hemi-aminal **5**, SPARTAN2014, MM-level (Spartan 2014, Wavefunction Inc., 18401 Von Karman Ave, Irvine, CA 92612, USA).

## X-ray crystallography

Experimental data for **3**: Data were collected on a Bruker-Nonius KappaCCD diffractometer with APEX II detector at  $T = 123.0(1)$  K using graphite-monochromated Mo- $K\alpha$  radiation ( $\lambda = 0.71073$  Å). Collect<sup>[1]</sup> software was used for data collection, whereas Denzo/Scalepack<sup>[2]</sup> were used for processing. Semi-empirical absorption correction was applied using SADABS2008.<sup>[3]</sup>

Crystal dimensions  $0.30 \times 0.20 \times 0.20$  mm,  $C_{32}H_{25}F_6FeN_7O_6S_2$ ,  $M = 837.56$ , triclinic, space group  $P1$ ,  $a = 9.2055(3)$  Å,  $b = 11.5244(4)$  Å,  $c = 16.9127(5)$  Å,  $\alpha = 100.554(2)^\circ$ ,  $\beta = 93.752(2)^\circ$ ,  $\gamma = 100.5206(18)^\circ$ ,  $V = 1725.13(10)$  Å<sup>3</sup>,  $Z = 2$ ,  $d_c = 1.612$  g cm<sup>-3</sup>,  $\mu = 0.647$  mm<sup>-1</sup>,  $F(000) = 852$ , 9519 reflections ( $2\theta_{max} = 50.49^\circ$ ) measured (6216 unique,  $R_{int} = 0.0266$ , completeness = 99.7%), Final  $R$  indices ( $I > 2\sigma(I)$ ):  $R_I = 0.0505$ ,  $wR_2 = 0.1026$ ,  $R$  indices (all data):  $R_I = 0.0696$ ,  $wR_2 = 0.1146$ .  $GOF = 1.062$  for 491 parameters and 1 restraint, largest diff. peak and hole  $0.789/-0.566$  eÅ<sup>-3</sup>. CCDC-1006930 contains the supplementary data for this structure. These data can be obtained free of charge via [www.ccdc.cam.ac.uk/data\\_request/cif](http://www.ccdc.cam.ac.uk/data_request/cif), or by emailing [data\\_request@ccdc.cam.ac.uk](mailto:data_request@ccdc.cam.ac.uk), or by contacting The Cambridge Crystallographic Data Centre, 12, Union Road, Cambridge CB2 1EZ, UK; fax: +44 1223 336033.

Experimental data for **4**: Data were collected on an Agilent SuperNova Dual diffractometer with Atlas detector at  $T = 123.0(1)$  K using mirror-monochromated Cu- $K\alpha$  radiation ( $\lambda = 1.54184$  Å). CrysAlisPro<sup>[4]</sup> software was used for data collection, integration and reduction as well as applying the numerical absorption correction.

<sup>[1]</sup> R.W.W. Hooft, *COLLECT*, **1998**, Nonius BV, Delft, The Netherlands.

<sup>[2]</sup> Z. Otwinowski, W. Minor, *Methods in Enzymology*, Vol. 276, *Macromolecular Crystallography*, Part A, edited by C. W. Carter Jr & R. M. Sweet, pp. 307-326. New York: Academic Press.

<sup>[3]</sup> G.M. Sheldrick, *SADABS*, Version 2008/2, **1996**, University of Göttingen, Germany.

<sup>[4]</sup> *CrysAlisPro*, 1.171.36.28 ed., Agilent Technologies, Ltd., Yarton, UK, **2009–2013**.

Crystal dimensions 0.154×0.066×0.018 mm, C<sub>18</sub>H<sub>14</sub>Cl<sub>2</sub>FeN<sub>4</sub>, *M* = 413.08, monoclinic, space group *C2/c*, *a* = 10.2438(3) Å, *b* = 19.3127(6) Å, *c* = 8.8565(2) Å,  $\alpha = 90^\circ$ ,  $\beta = 101.637(3)^\circ$ ,  $\gamma = 90^\circ$ , *V* = 1716.11(8) Å<sup>3</sup>, *Z* = 4, *d<sub>c</sub>* = 1.599 g cm<sup>-3</sup>,  $\mu$  = 9.976 mm<sup>-1</sup>, *F*(000) = 840, 2658 reflections ( $2\theta_{max}$  = 135.48°) measured (1545 unique, *R<sub>int</sub>* = 0.0225, completeness = 98.6%), Final *R* indices (*I* > 2σ(*I*)): *R<sub>I</sub>* = 0.0343, *wR<sub>2</sub>* = 0.0897, *R* indices (all data): *R<sub>I</sub>* = 0.0362, *wR<sub>2</sub>* = 0.0922. *GOF* = 1.063 for 114 parameters and 0 restraints, largest diff. peak and hole 0.426/−0.312 eÅ<sup>-3</sup>. CCDC-1006931 contains the supplementary data for this structure. These data can be obtained free of charge via [www.ccdc.cam.ac.uk/data\\_request/cif](http://www.ccdc.cam.ac.uk/data_request/cif), or by emailing [data\\_request@ccdc.cam.ac.uk](mailto:data_request@ccdc.cam.ac.uk), or by contacting The Cambridge Crystallographic Data Centre, 12, Union Road, Cambridge CB2 1EZ, UK; fax: +44 1223 336033.

The structures were solved by charge flipping with Superflip<sup>[5]</sup> and refined by full-matrix least-squares methods using WinGX software,<sup>[6]</sup> which utilizes the SHELXL-2013 module.<sup>[7]</sup> The positions of carbon-bound hydrogen atoms were calculated and refined as riding on the parent carbon atoms with *U<sub>H</sub>* = 1.2 *U<sub>C</sub>*. The nitrogen-bound hydrogen atoms in **3** were found in the electron density difference map and refined with *U<sub>H</sub>* = 1.2 *U<sub>N</sub>*, constrained in one (coordinating amination NH) and restrained in the other case (non-coordinating amination NH).

---

<sup>[5]</sup> L. Palatinus, G. Chapuis, *J. Appl. Crystallogr.* **2007**, *40*, 786–790.

<sup>[6]</sup> L. J. Farrugia, *J. Appl. Crystallogr.* **2012**, *45*, 849–854.

<sup>[7]</sup> G. Sheldrick, *Acta Crystallogr. A* **2008**, *64*, 112–122.
